# Supplementary material for: LMO3 promotes hepatocellular carcinoma invasion, metastasis and anoikis inhibition by directly interacting with LATS1 and suppressing Hippo signaling
Source: PubMed Central journal article supplement (PMC6139164; doi:10.1186/s13046-018-0903-3), 2018-09-15
Supplement: 13046_2018_903_MOESM4_ESM.pdf [file 13046_2018_903_MOESM4_ESM.pdf]

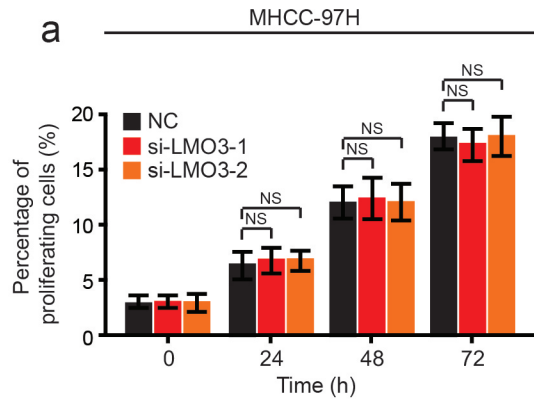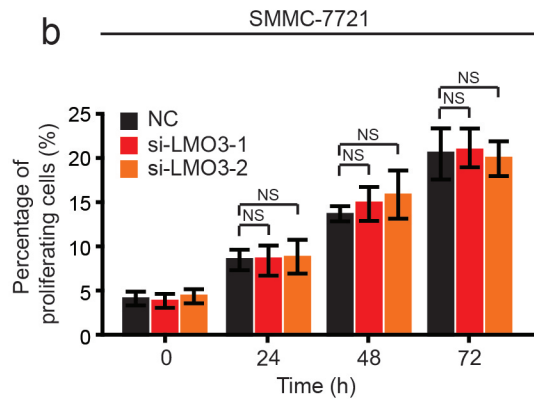

Supplementary Figure 1
