# Supplementary material for: LMO3 promotes hepatocellular carcinoma invasion, metastasis and anoikis inhibition by directly interacting with LATS1 and suppressing Hippo signaling
Source: Springer Nature journal article supplement (doi:10.1186/s13046-018-0903-3), 2018-09-15
Supplement: MOESM2 [file 16127236]

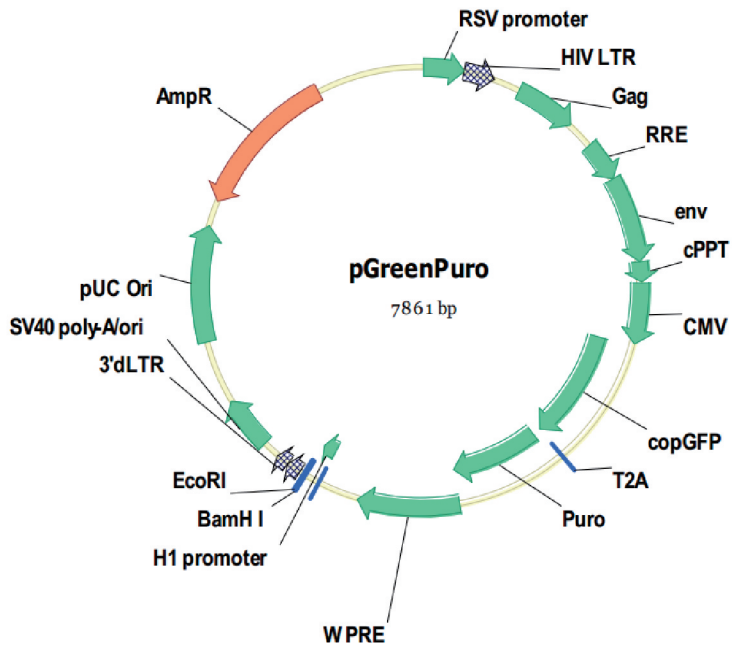

Supplementary Figure 2
